# Supplementary material
Source: PubMed Central journal article supplement (PMC4289680)
Supplement: mmc1.pdf [file mmc1.pdf]

**The American Journal of Human Genetics, Volume 96**

**Supplemental Data**

## **Biased Allelic Expression in Human Primary Fibroblast Single Cells**

**Christelle Borel, Pedro G. Ferreira, Federico Santoni, Olivier Delaneau, Alexandre Fort,  
Konstantin Y. Popadin, Marco Garieri, Emilie Falconnet, Pascale Ribaux, Michel  
Guipponi, Ismael Padioleau, Piero Carninci, Emmanouil T. Dermitzakis, and Stylianos E.  
Antonarakis**

**Figure S1.**

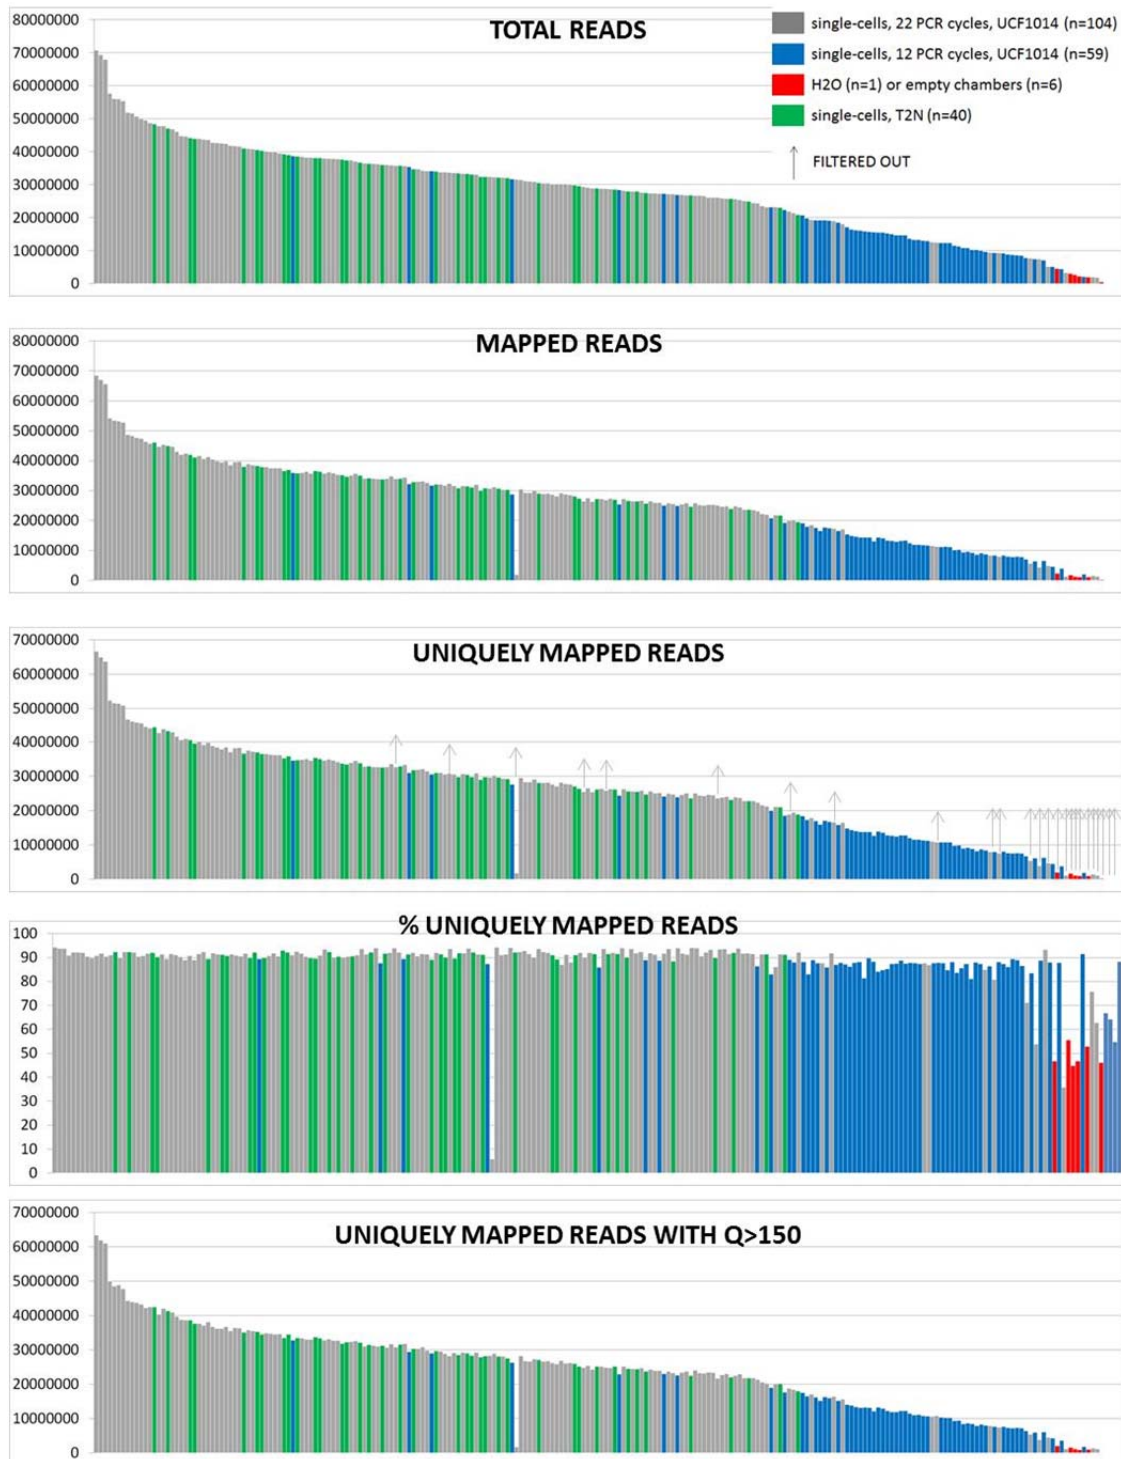

**Figure S1. Read distribution for single-cell samples (UCF1014 and T2N)**

Histograms displayed read distribution per sample (y-axis, number of reads or percentage of reads). We used color code to differentiate single-cell samples amplified with 12 PCR cycles (blue) or with 22 PCR cycles (grey, standard protocol). We included one sample containing water instead of pre-amplified cDNA and samples from empty capture chamber, i.e. chambers containing no cell after single-cell capture procedure (red). Samples colored in green are single-cell samples from T2N fibroblasts, whereas all the other single-cell samples have been prepared from UCF1014 fibroblasts.

**Figure S2.**

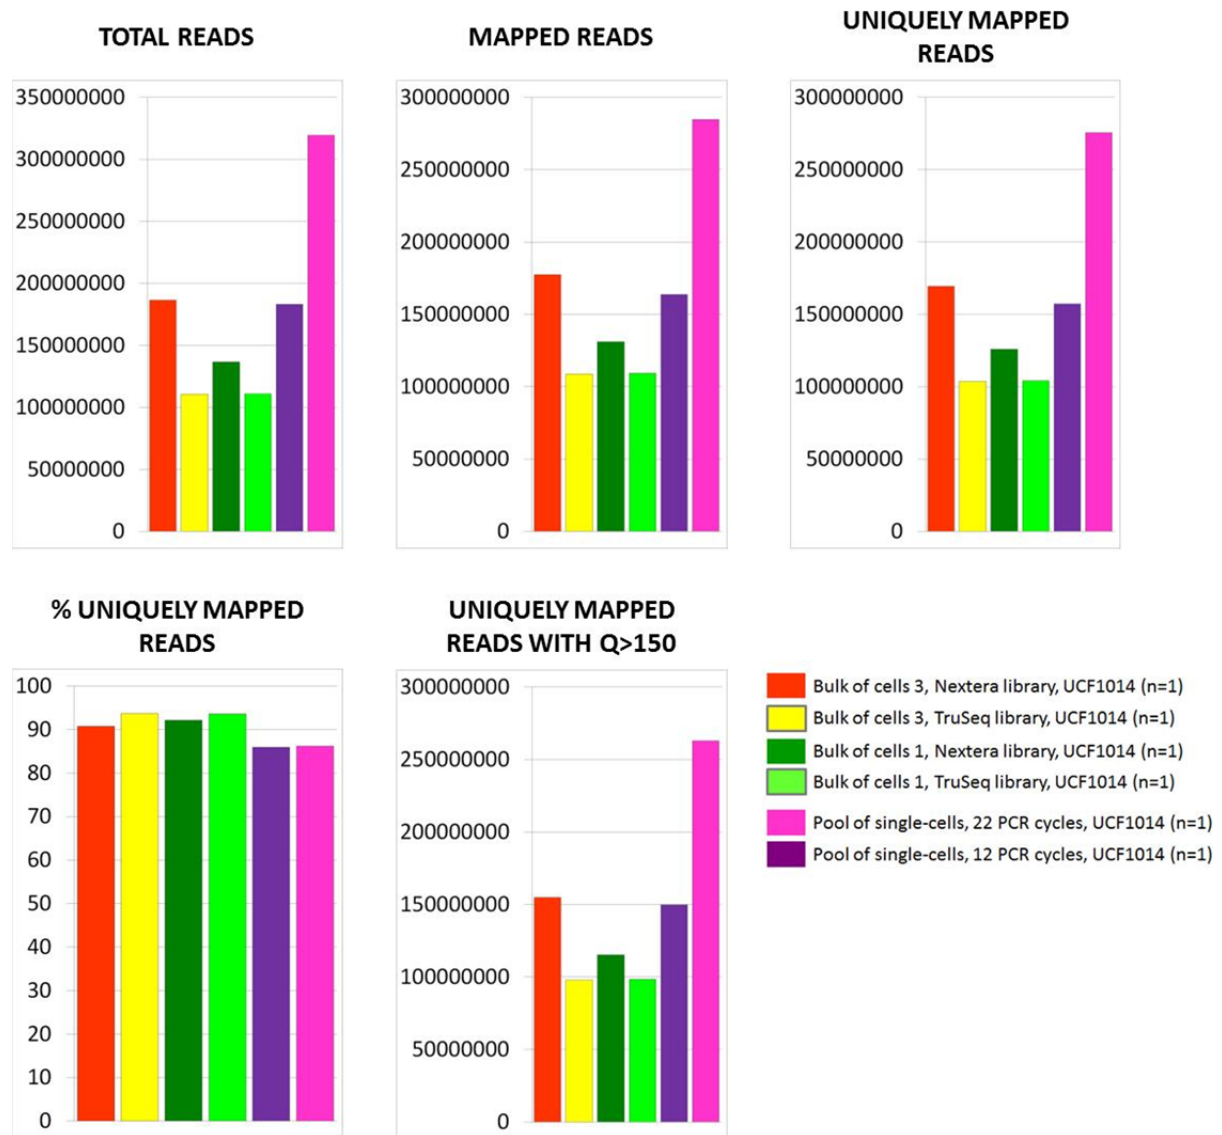

**Figure S2. Read distribution for bulk of cells and pool of single-cells (UCF1014).** Histograms displayed read distribution per sample (y-axis, number of reads or percentage of reads). We used color code to differentiate samples. See Figure 1 and method section summarizing the experimental workflow and describing the different types of samples.

Figure S3.

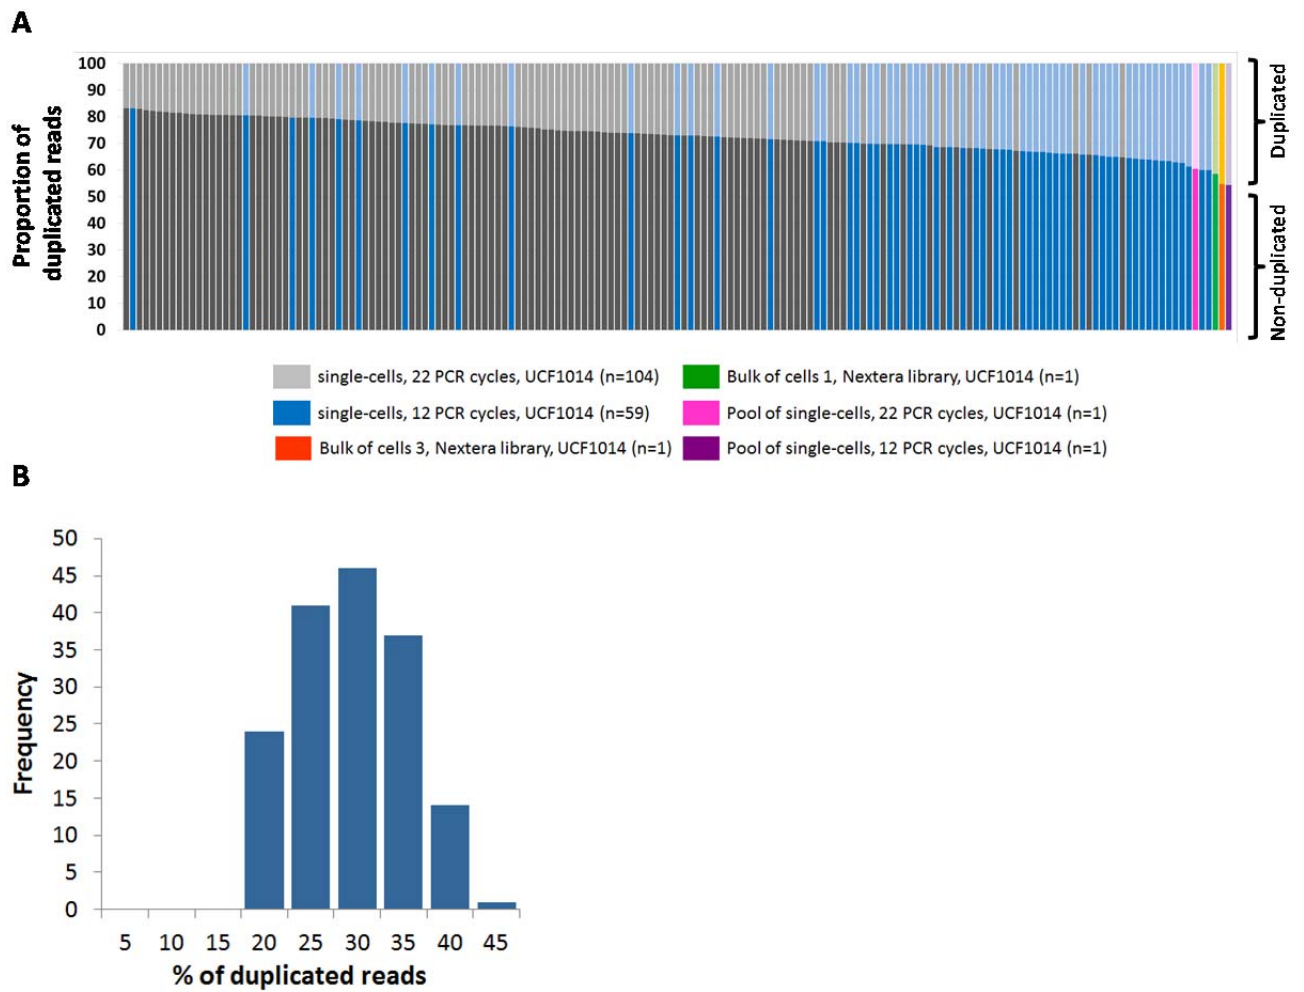

**Figure S3. Read duplicates (UCF1014).**

(a) Read duplicate refers to reads with identical coordinates. We determined read duplicates for all the samples and we depicted their proportion. Single-cell samples have an average of 73.2% of non-duplicated reads and standard deviation of 5.6%.

(b) Frequency graph shows the distribution of the % of read duplicates across the single-cell samples.

**Figure S4.**

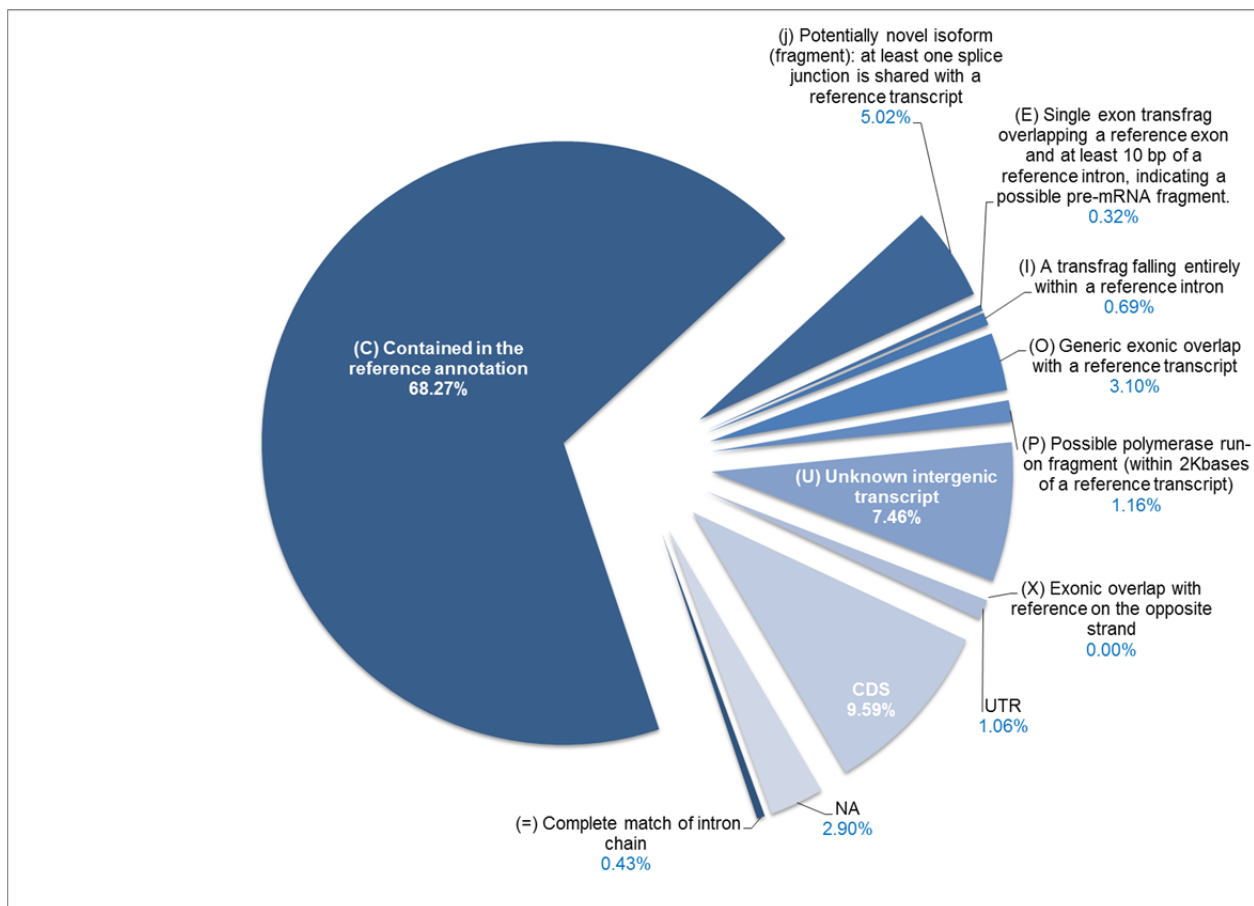

**Figure S4. Genomic annotation of 83576 hetSNVs (UCF1014) (>16 reads at position) after cufflinks novel assembly.** The pie chart shows the percentage of hetSNVs classified in each Cufflinks class code described by Cuffcompare.

Figure S5.

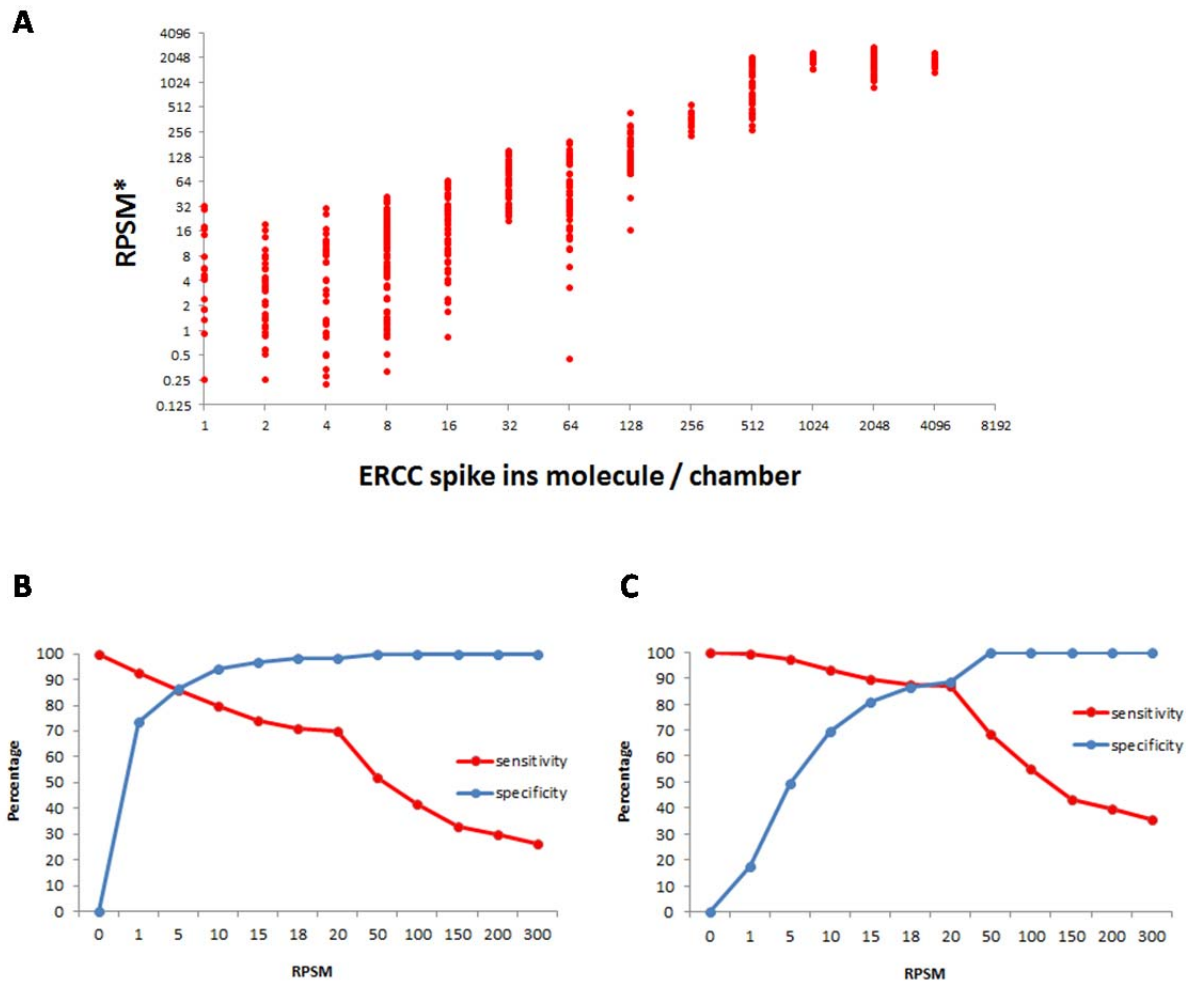

Figure S5. Spike-in experiment

During a single-cell capture experiment, we added to the lysis mix 92 ERCC synthetic spike-in controls at known concentrations. The lysis mix is then uniformly distributed in every chambers. We sequenced 12 spiked fibroblasts from 12 different chambers. (a) The plot shows the number of predicted ERCC spike-in molecule number (see methods) versus the observed normalized read number expressed in RPSM units for a nucleotide located in the middle of the spike sequence (\* RPSM, reads at a single nucleotide position per sequencing read length (in kb) and per million mapped reads). Additionally, we calculated the sensitivity and specificity for 4 spike-in molecules (b) and for 8 spike-in molecules (c) at different RPSM levels.

**Figure S6.**

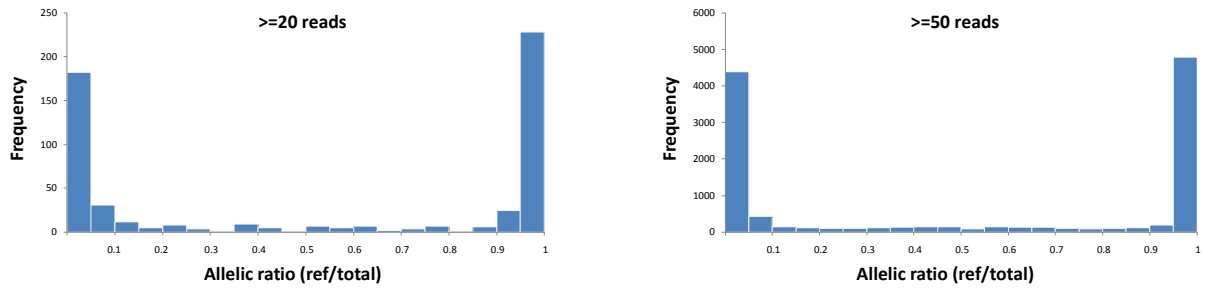

**Figure S6. Allelic ratio and read coverage at hetSNV position (UCF1014).**

Frequency distribution histograms of the allelic ratio (reference reads / total reads) according to the read coverage at hetSNVs position (RPSM>20, 163 UCF1014 single cells).

Figure S7.

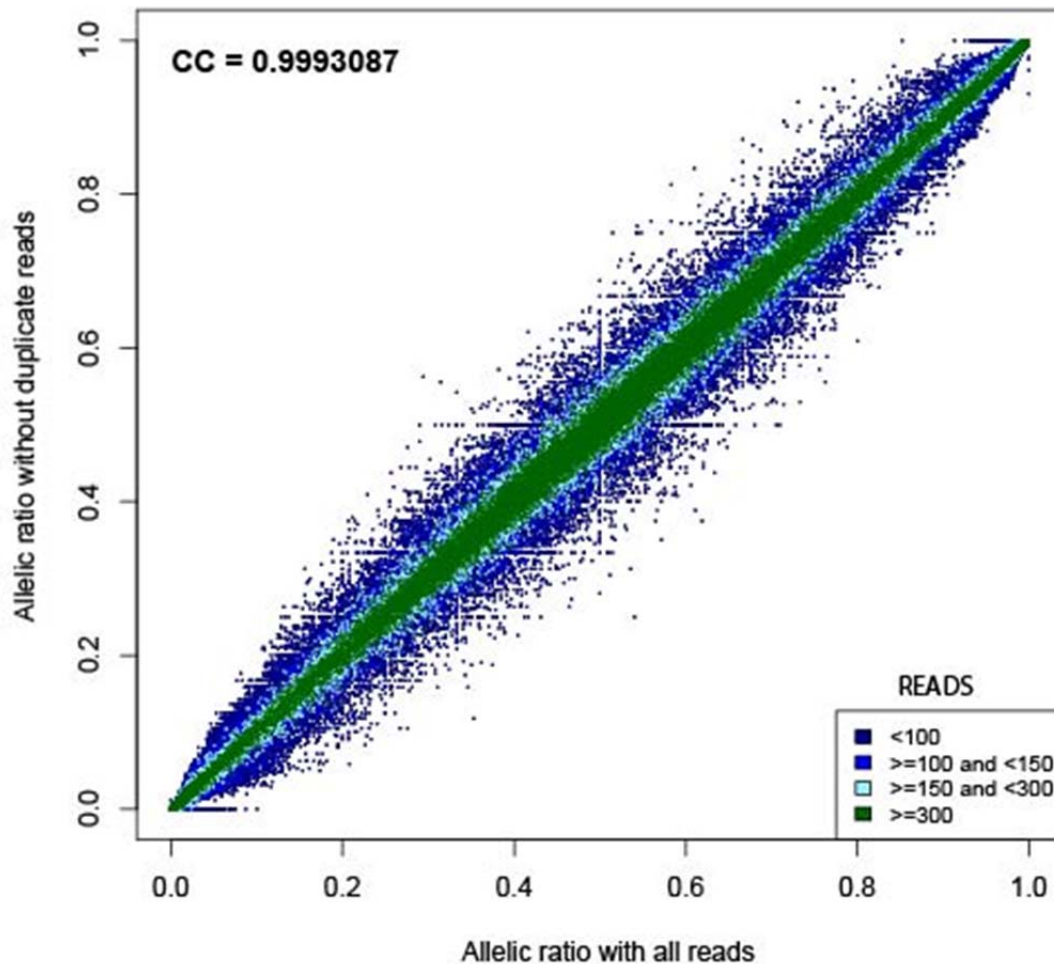

**Figure S7. Effect of duplicates reads on allelic ratio.**

Pairwise comparison of the allelic ratio after removing the duplicate reads (Y-axis) and all the reads (X-axis). Pearson coefficient of correlation is indicated at the top of the scatter plot. Points are color coded according to the read coverage at hetSNVs position. (RPSM threshold is not applied; 163 UCF1014 single cells).



Figure S8.

A

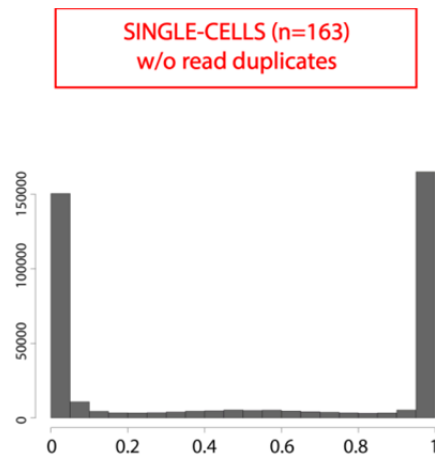

B

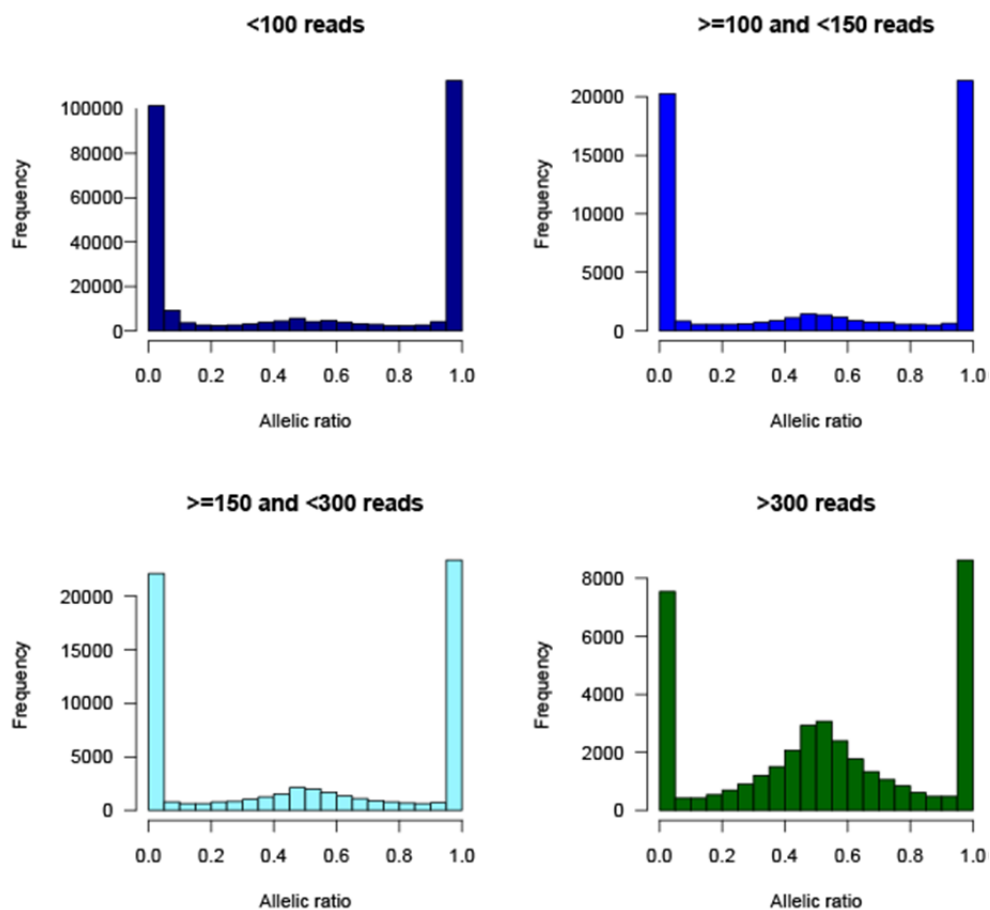

**Figure S8. Allelic ratio and read coverage at hetSNV position (UCF1014) after removing duplicate reads. (a)** Frequency distribution histogram of the allelic ratio of single cells (reference reads/ total reads) after removing duplicate reads. **(b)** Frequency distribution according to the read coverage. (RPSM threshold is not applied; 163 UCF1014 single cells).

**Figure S9.**

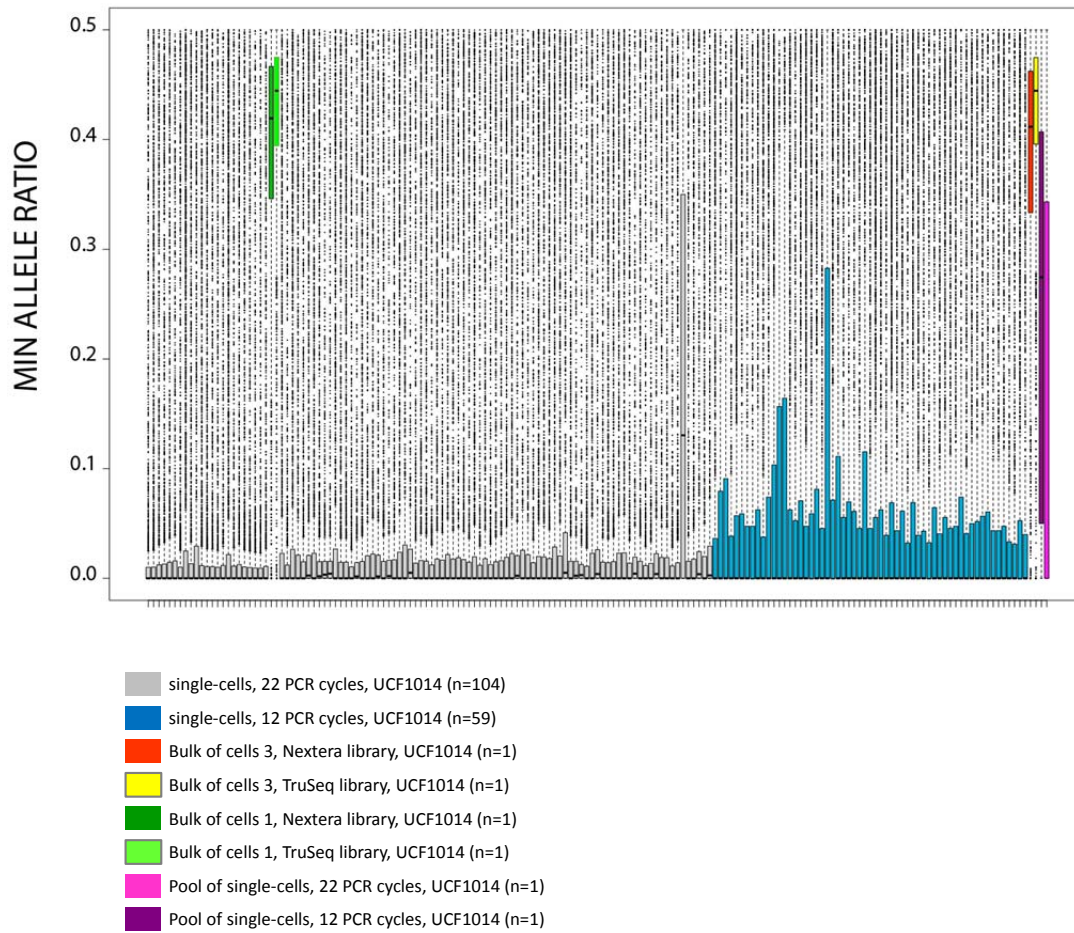

**Figure S9. Distribution of minimum allelic ratio across the samples.** The minimum allelic ratio is the absolute value of the difference between 0.5 and the allelic ratio (reference reads / total reads). Graph is made of side-by-side boxplots (x-axis, samples). RPSM threshold is not applied.

**Figure S10.**

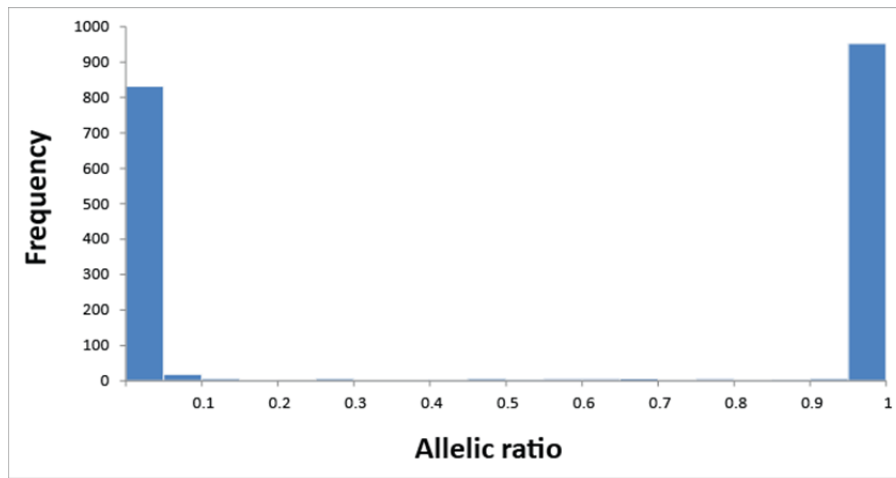

**Figure S10. Allelic ratio in single cells on chromosome X (UCF1014).** Frequency distribution histograms of the allelic ratio (reference reads / total reads) for hetSNVs located on chromosome X (RPSM>20, 163 UCF1014 single cells). As expected, due to X-inactivation, the transcription is random (one allele or the other with no specification of the parental origin) and monoallelic across all the single cells.

Figure S11.

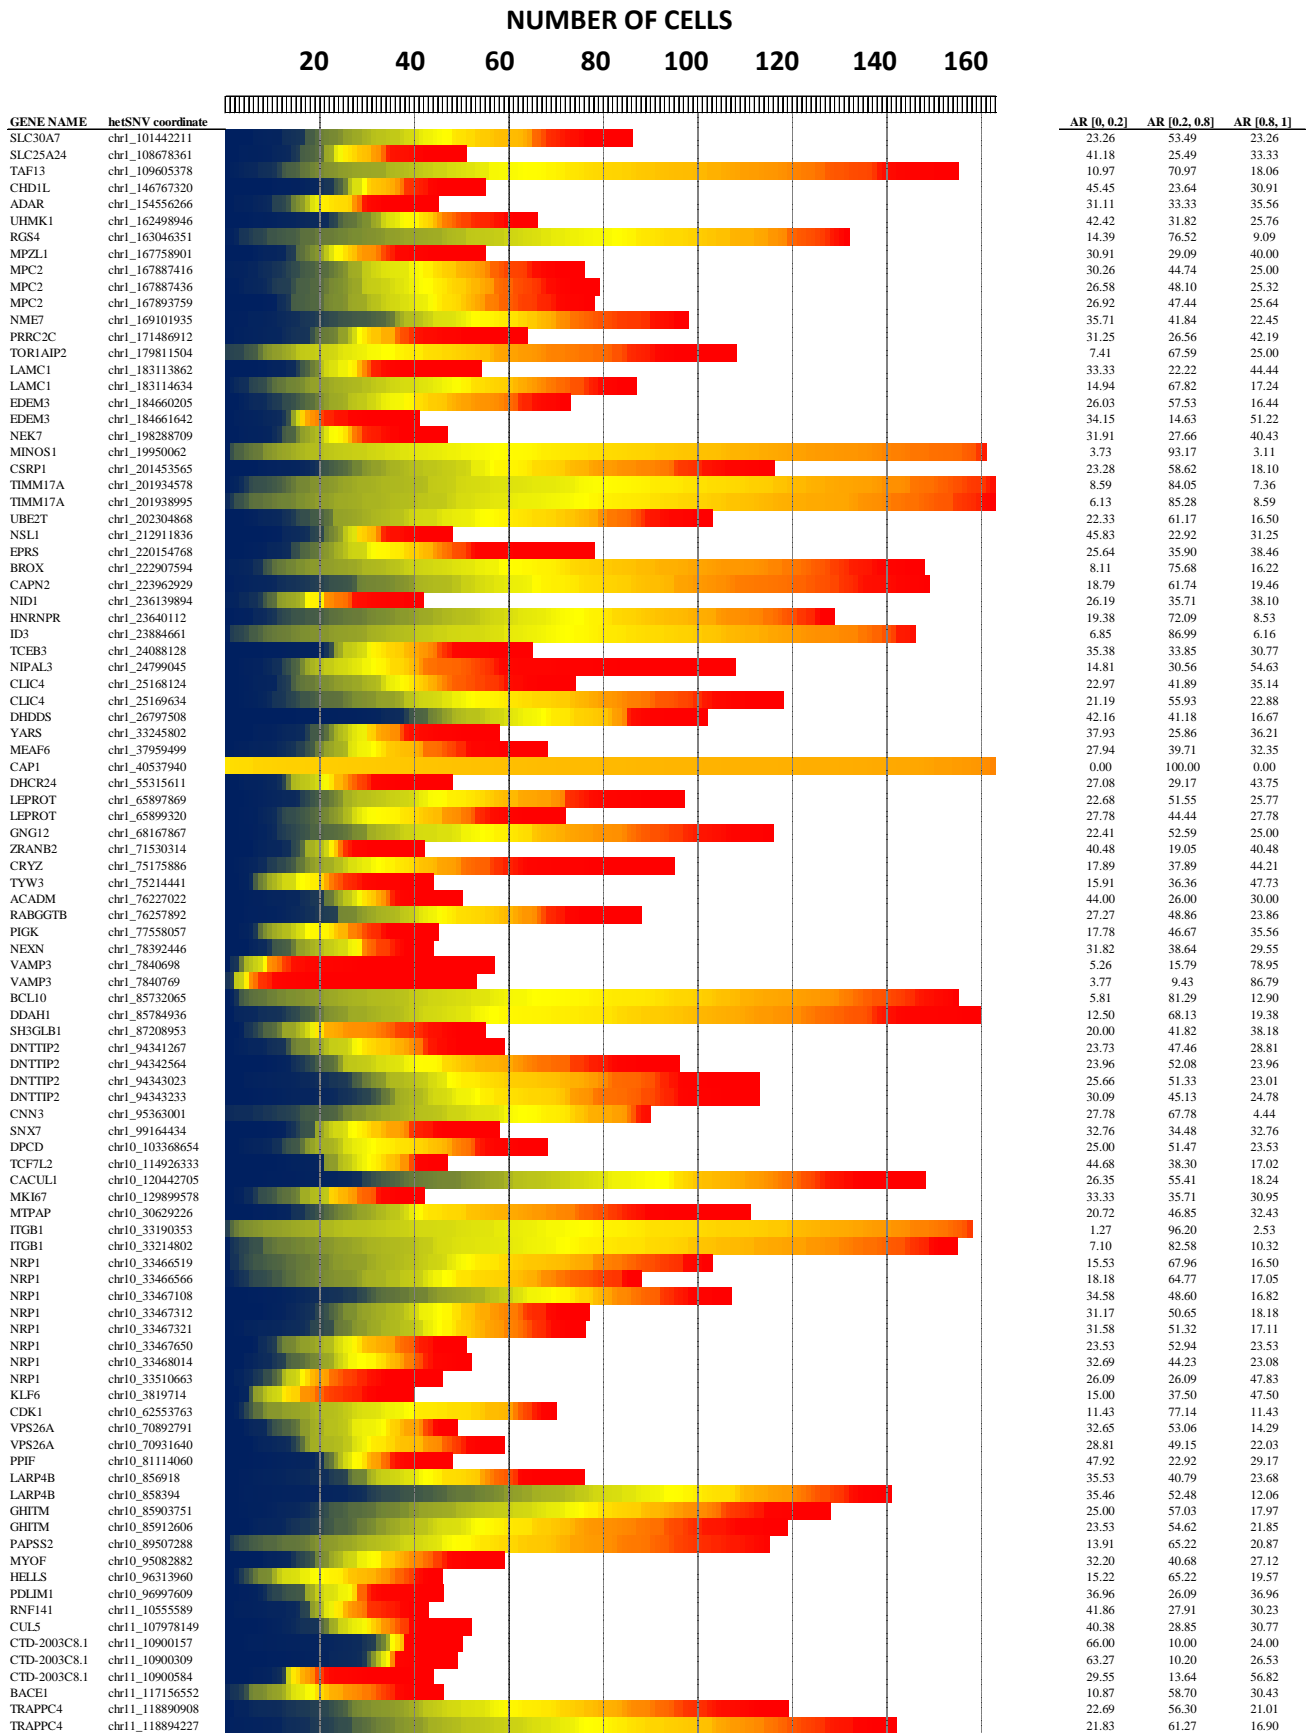

|               |                 |  |  |  |  |  |  |  |  |       |       |       |
|---------------|-----------------|--|--|--|--|--|--|--|--|-------|-------|-------|
| DPAGT1        | chr11_118967291 |  |  |  |  |  |  |  |  | 34.00 | 38.00 | 28.00 |
| DPAGT1        | chr11_118967758 |  |  |  |  |  |  |  |  | 30.36 | 35.71 | 33.93 |
| USP47         | chr11_11976628  |  |  |  |  |  |  |  |  | 33.90 | 35.59 | 30.51 |
| RP11-166D19.1 | chr11_121960257 |  |  |  |  |  |  |  |  | 55.83 | 43.56 | 0.61  |
| CLMP          | chr11_122943495 |  |  |  |  |  |  |  |  | 34.88 | 13.95 | 51.16 |
| CLMP          | chr11_122943802 |  |  |  |  |  |  |  |  | 24.32 | 31.08 | 44.59 |
| SRFR          | chr11_126133208 |  |  |  |  |  |  |  |  | 24.29 | 31.43 | 44.29 |
| CD44          | chr11_35252926  |  |  |  |  |  |  |  |  | 3.09  | 93.83 | 3.09  |
| CD44          | chr11_35253272  |  |  |  |  |  |  |  |  | 3.09  | 96.91 | 0.00  |
| RRM1          | chr11_4141132   |  |  |  |  |  |  |  |  | 27.63 | 44.74 | 27.63 |
| ATL3          | chr11_63393243  |  |  |  |  |  |  |  |  | 4.17  | 29.17 | 66.67 |
| ATL3          | chr11_63395639  |  |  |  |  |  |  |  |  | 2.91  | 24.27 | 72.82 |
| NEAT1         | chr11_65205958  |  |  |  |  |  |  |  |  | 32.56 | 39.53 | 27.91 |
| CCND1         | chr11_69466737  |  |  |  |  |  |  |  |  | 36.07 | 32.79 | 31.15 |
| RAB6A         | chr11_73388363  |  |  |  |  |  |  |  |  | 36.59 | 24.39 | 39.02 |
| MRPL48        | chr11_73575499  |  |  |  |  |  |  |  |  | 41.56 | 35.06 | 23.38 |
| MRPL48        | chr11_73575504  |  |  |  |  |  |  |  |  | 42.86 | 33.77 | 23.38 |
| PRCP          | chr11_82535461  |  |  |  |  |  |  |  |  | 36.07 | 40.98 | 22.95 |
| EED           | chr11_85968623  |  |  |  |  |  |  |  |  | 47.62 | 21.43 | 30.95 |
| IPO7          | chr11_9468367   |  |  |  |  |  |  |  |  | 17.57 | 59.46 | 22.97 |
| RAD52         | chr12_1021557   |  |  |  |  |  |  |  |  | 73.81 | 2.38  | 23.81 |
| NTSDC3        | chr12_104167185 |  |  |  |  |  |  |  |  | 28.00 | 34.00 | 38.00 |
| NTSDC3        | chr12_104167404 |  |  |  |  |  |  |  |  | 27.08 | 33.33 | 39.58 |
| NTSDC3        | chr12_104168087 |  |  |  |  |  |  |  |  | 24.44 | 35.56 | 40.00 |
| C12orf75      | chr12_105764984 |  |  |  |  |  |  |  |  | 4.20  | 61.34 | 34.45 |
| C12orf23      | chr12_107367224 |  |  |  |  |  |  |  |  | 11.95 | 81.76 | 6.29  |
| C12orf23      | chr12_107367225 |  |  |  |  |  |  |  |  | 11.95 | 81.76 | 6.29  |
| C12orf23      | chr12_107367439 |  |  |  |  |  |  |  |  | 7.50  | 83.13 | 9.38  |
| MAGOHB        | chr12_10758703  |  |  |  |  |  |  |  |  | 22.22 | 64.81 | 12.96 |
| MAGOHB        | chr12_10763236  |  |  |  |  |  |  |  |  | 18.07 | 66.27 | 15.66 |
| CSDA          | chr12_10851772  |  |  |  |  |  |  |  |  | 18.26 | 68.70 | 13.04 |
| WSB2          | chr12_118471760 |  |  |  |  |  |  |  |  | 21.74 | 26.09 | 52.17 |
| TRIAP1        | chr12_120882112 |  |  |  |  |  |  |  |  | 22.55 | 43.14 | 34.31 |
| TRIAP1        | chr12_120882217 |  |  |  |  |  |  |  |  | 23.08 | 43.27 | 33.65 |
| POP5          | chr12_121017171 |  |  |  |  |  |  |  |  | 21.74 | 51.30 | 26.96 |
| GPRC5A        | chr12_13069410  |  |  |  |  |  |  |  |  | 34.62 | 38.46 | 26.92 |
| GPRC5A        | chr12_13070752  |  |  |  |  |  |  |  |  | 34.09 | 47.73 | 18.18 |
| RAN           | chr12_131361241 |  |  |  |  |  |  |  |  | 30.00 | 40.00 | 30.00 |
| EMPI          | chr12_13369574  |  |  |  |  |  |  |  |  | 25.81 | 38.71 | 35.48 |
| MGST1         | chr12_16516994  |  |  |  |  |  |  |  |  | 20.00 | 52.14 | 27.86 |
| GOLT1B        | chr12_21669996  |  |  |  |  |  |  |  |  | 19.18 | 50.68 | 30.14 |
| GOLT1B        | chr12_21670020  |  |  |  |  |  |  |  |  | 31.82 | 51.52 | 16.67 |
| MRPS35        | chr12_27867727  |  |  |  |  |  |  |  |  | 31.91 | 38.30 | 29.79 |
| MRPS35        | chr12_27908603  |  |  |  |  |  |  |  |  | 20.00 | 45.00 | 35.00 |
| C12orf5       | chr12_4462040   |  |  |  |  |  |  |  |  | 28.81 | 37.29 | 33.90 |
| ARID2         | chr12_46300100  |  |  |  |  |  |  |  |  | 22.14 | 58.57 | 19.29 |
| AMIGO2        | chr12_47471439  |  |  |  |  |  |  |  |  | 32.00 | 26.00 | 42.00 |
| TMEM106C      | chr12_48359984  |  |  |  |  |  |  |  |  | 39.08 | 36.78 | 24.14 |
| TMEM106C      | chr12_48362412  |  |  |  |  |  |  |  |  | 35.37 | 42.68 | 21.95 |
| LIMA1         | chr12_50570127  |  |  |  |  |  |  |  |  | 30.89 | 47.97 | 21.14 |
| LIMA1         | chr12_50570519  |  |  |  |  |  |  |  |  | 20.45 | 42.05 | 37.50 |
| LIMA1         | chr12_50616346  |  |  |  |  |  |  |  |  | 13.77 | 78.26 | 7.97  |
| CBX5          | chr12_54625518  |  |  |  |  |  |  |  |  | 25.96 | 47.12 | 26.92 |
| NACA          | chr12_57108203  |  |  |  |  |  |  |  |  | 1.84  | 96.93 | 1.23  |
| USP15         | chr12_62696599  |  |  |  |  |  |  |  |  | 19.35 | 50.54 | 30.11 |
| HMG2          | chr12_66358347  |  |  |  |  |  |  |  |  | 35.29 | 27.45 | 37.25 |
| HMG2          | chr12_66359752  |  |  |  |  |  |  |  |  | 24.36 | 37.18 | 38.46 |
| COPS7A        | chr12_6840371   |  |  |  |  |  |  |  |  | 28.26 | 36.96 | 34.78 |
| KRR1          | chr12_75893486  |  |  |  |  |  |  |  |  | 0.00  | 7.58  | 92.42 |
| KRR1          | chr12_75900588  |  |  |  |  |  |  |  |  | 26.32 | 43.86 | 29.82 |
| C12orf29      | chr12_88440676  |  |  |  |  |  |  |  |  | 25.45 | 23.64 | 50.91 |
| DCN           | chr12_91539687  |  |  |  |  |  |  |  |  | 27.66 | 46.81 | 25.53 |
| EEA1          | chr12_93166538  |  |  |  |  |  |  |  |  | 39.33 | 32.58 | 28.09 |
| EEA1          | chr12_93167435  |  |  |  |  |  |  |  |  | 24.62 | 40.00 | 35.38 |
| MRPL42        | chr12_93862989  |  |  |  |  |  |  |  |  | 19.18 | 67.12 | 13.70 |
| TMPO          | chr12_98943585  |  |  |  |  |  |  |  |  | 12.87 | 68.32 | 18.81 |
| CDC16         | chr13_115030714 |  |  |  |  |  |  |  |  | 54.17 | 12.50 | 33.33 |
| EXOSC8        | chr13_37580139  |  |  |  |  |  |  |  |  | 10.87 | 70.29 | 18.84 |
| GTF2F2        | chr13_45841502  |  |  |  |  |  |  |  |  | 47.27 | 27.27 | 25.45 |
| RBM26         | chr13_79894736  |  |  |  |  |  |  |  |  | 24.69 | 50.62 | 24.69 |
| STK24         | chr13_99104689  |  |  |  |  |  |  |  |  | 40.43 | 40.43 | 19.15 |
| PPP2R5C       | chr14_102323093 |  |  |  |  |  |  |  |  | 19.33 | 57.14 | 23.53 |
| ZFYVE21       | chr14_104199580 |  |  |  |  |  |  |  |  | 45.24 | 26.19 | 28.57 |
| DAD1          | chr14_23033838  |  |  |  |  |  |  |  |  | 0.61  | 96.93 | 2.45  |
| C14orf19      | chr14_23567369  |  |  |  |  |  |  |  |  | 19.44 | 57.64 | 22.92 |
| PSME1         | chr14_24606928  |  |  |  |  |  |  |  |  | 25.00 | 53.00 | 22.00 |
| SEC23A        | chr14_39517925  |  |  |  |  |  |  |  |  | 36.99 | 38.36 | 24.66 |
| FRMD6         | chr14_52196115  |  |  |  |  |  |  |  |  | 24.77 | 50.46 | 24.77 |
| CNIH          | chr14_54894296  |  |  |  |  |  |  |  |  | 18.05 | 69.92 | 12.03 |
| DLGAP5        | chr14_55655692  |  |  |  |  |  |  |  |  | 16.18 | 69.12 | 14.71 |
| KTN1          | chr14_56078739  |  |  |  |  |  |  |  |  | 17.31 | 69.23 | 13.46 |
| JKAMP         | chr14_59971039  |  |  |  |  |  |  |  |  | 16.20 | 59.15 | 24.65 |
| DHRS7         | chr14_60611648  |  |  |  |  |  |  |  |  | 18.84 | 53.62 | 27.54 |
| DHRS7         | chr14_60611675  |  |  |  |  |  |  |  |  | 16.46 | 55.70 | 27.85 |
| ELMSAN1       | chr14_74182810  |  |  |  |  |  |  |  |  | 13.53 | 55.64 | 30.83 |
| EIF2B2        | chr14_75476071  |  |  |  |  |  |  |  |  | 57.78 | 20.00 | 22.22 |
| GPATCH2L      | chr14_76645514  |  |  |  |  |  |  |  |  | 37.78 | 17.78 | 44.44 |
| RP11-66B24.4  | chr15_101455840 |  |  |  |  |  |  |  |  | 40.00 | 44.71 | 15.29 |
| CHSY1         | chr15_101716583 |  |  |  |  |  |  |  |  | 36.36 | 44.32 | 19.32 |
| CHSY1         | chr15_101717065 |  |  |  |  |  |  |  |  | 38.27 | 39.51 | 22.22 |
| NDUFAF1       | chr15_41679685  |  |  |  |  |  |  |  |  | 40.00 | 20.00 | 40.00 |
| TMEM87A       | chr15_42529665  |  |  |  |  |  |  |  |  | 46.51 | 23.26 | 30.23 |
| FBN1          | chr15_48702457  |  |  |  |  |  |  |  |  | 13.79 | 63.45 | 22.76 |
| FBN1          | chr15_48702873  |  |  |  |  |  |  |  |  | 20.45 | 51.52 | 28.03 |
| USP8          | chr15_50769520  |  |  |  |  |  |  |  |  | 39.58 | 25.00 | 35.42 |
| ARPP19        | chr15_52843442  |  |  |  |  |  |  |  |  | 38.30 | 38.30 | 23.40 |
| BNIP2         | chr15_59951573  |  |  |  |  |  |  |  |  | 43.75 | 26.25 | 30.00 |
| BNIP2         | chr15_59951997  |  |  |  |  |  |  |  |  | 41.33 | 29.33 | 29.33 |
| BNIP2         | chr15_59952253  |  |  |  |  |  |  |  |  | 47.44 | 25.64 | 26.92 |
| BNIP2         | chr15_59952341  |  |  |  |  |  |  |  |  | 48.15 | 24.69 | 27.16 |

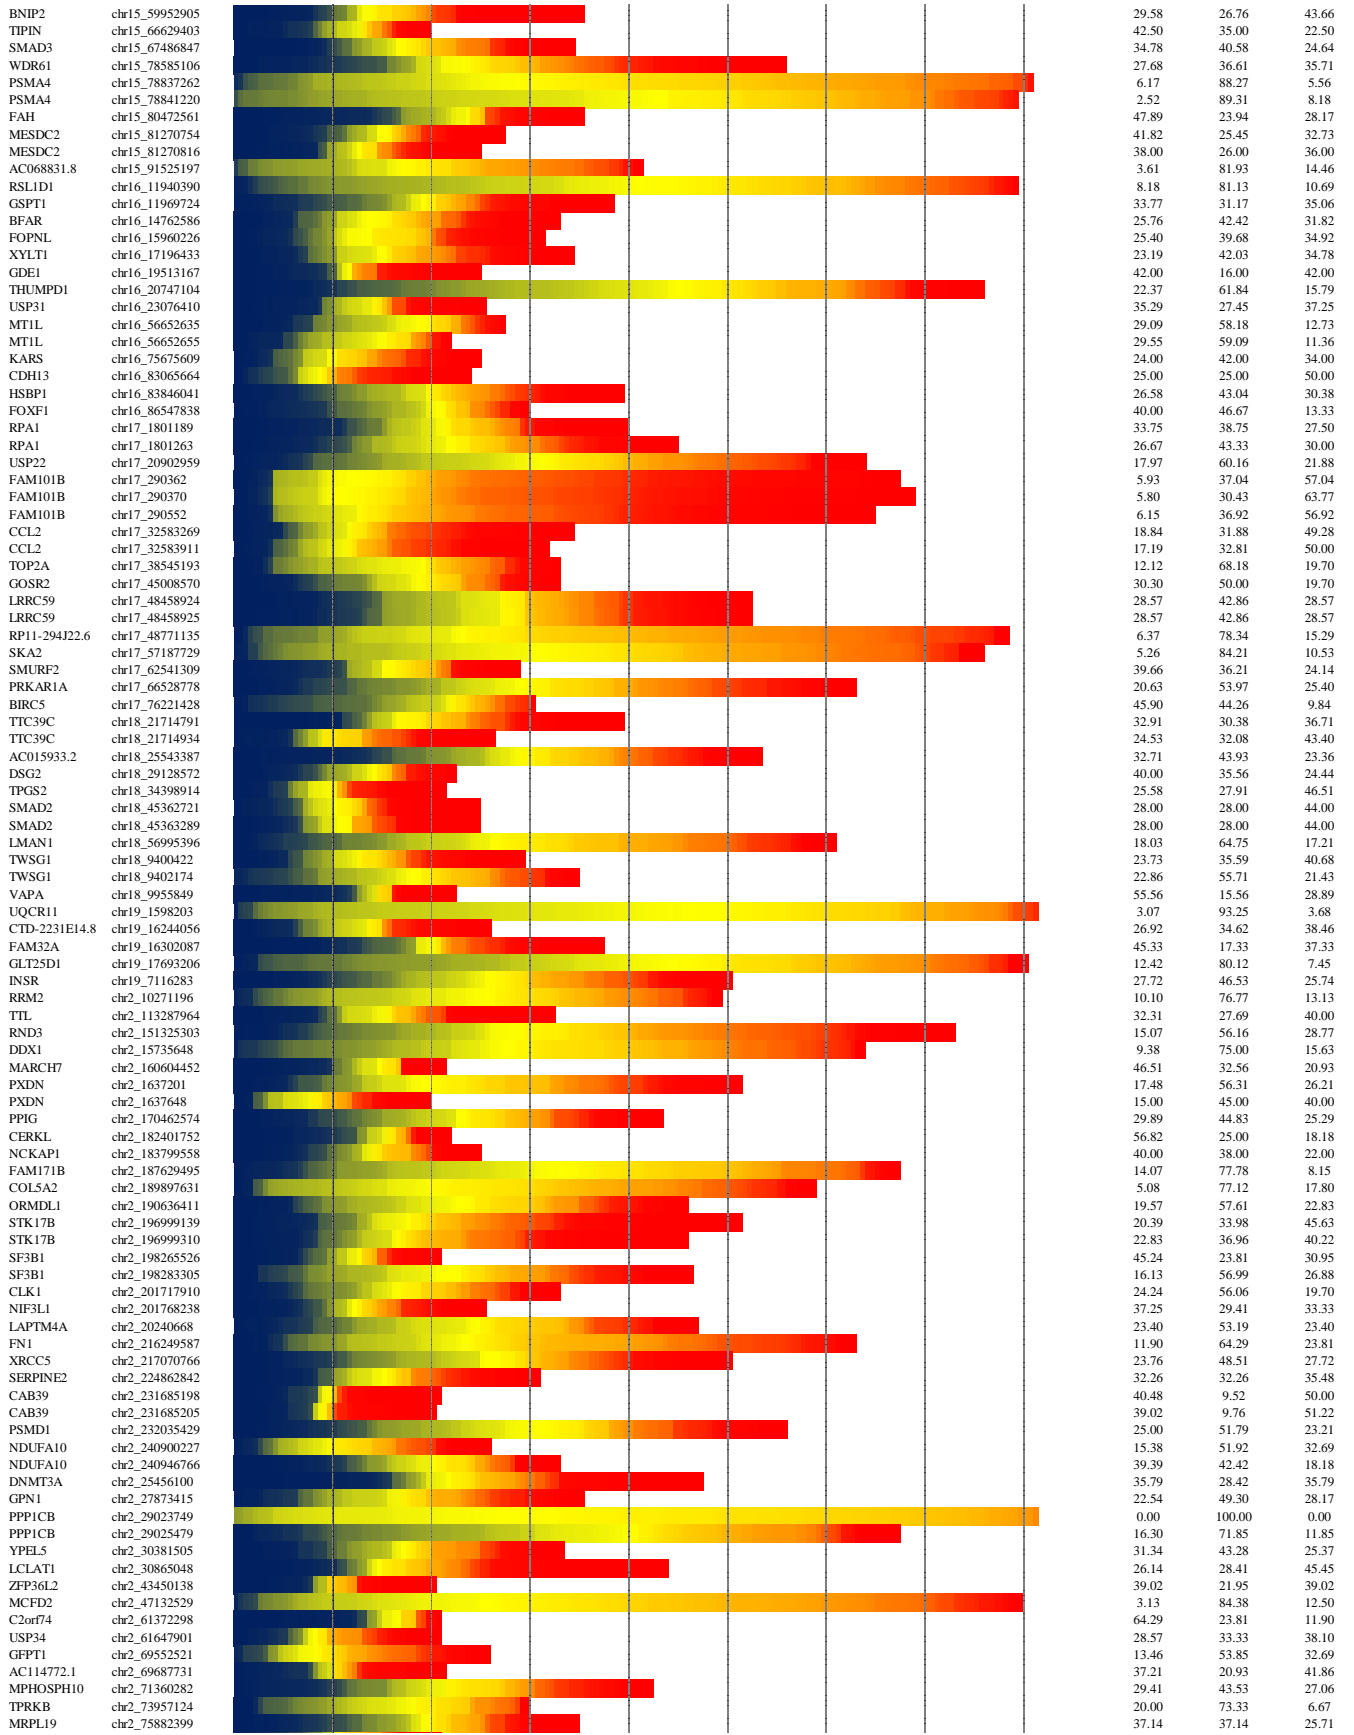

|              |                |  |  |  |  |  |  |  |  |       |       |       |
|--------------|----------------|--|--|--|--|--|--|--|--|-------|-------|-------|
| MRPL19       | chr2_75882576  |  |  |  |  |  |  |  |  | 35.71 | 35.71 | 28.57 |
| CHMP3        | chr2_86731290  |  |  |  |  |  |  |  |  | 38.10 | 16.67 | 45.24 |
| RNF103-CHMP3 | chr2_86756381  |  |  |  |  |  |  |  |  | 35.38 | 29.23 | 35.38 |
| MRPS5        | chr2_95775761  |  |  |  |  |  |  |  |  | 29.41 | 41.18 | 29.41 |
| STARD7       | chr2_96850885  |  |  |  |  |  |  |  |  | 14.19 | 67.74 | 18.06 |
| FKBP1A       | chr20_1350672  |  |  |  |  |  |  |  |  | 9.87  | 77.63 | 12.50 |
| ITCH         | chr20_33095891 |  |  |  |  |  |  |  |  | 25.00 | 30.00 | 45.00 |
| PROCR        | chr20_33764632 |  |  |  |  |  |  |  |  | 29.51 | 40.98 | 29.51 |
| RP4-564F22.2 | chr20_37059749 |  |  |  |  |  |  |  |  | 8.00  | 14.00 | 78.00 |
| SRSF6        | chr20_42091357 |  |  |  |  |  |  |  |  | 3.07  | 91.41 | 5.52  |
| YWHAB        | chr20_43530234 |  |  |  |  |  |  |  |  | 8.92  | 74.52 | 16.56 |
| CSEIL        | chr20_47685320 |  |  |  |  |  |  |  |  | 19.48 | 50.65 | 29.87 |
| ZNFY1-AS1    | chr20_47895702 |  |  |  |  |  |  |  |  | 5.92  | 71.71 | 22.37 |
| ADNP         | chr20_49506195 |  |  |  |  |  |  |  |  | 16.23 | 69.48 | 14.29 |
| AURKA        | chr20_54945211 |  |  |  |  |  |  |  |  | 30.43 | 47.83 | 21.74 |
| RPS21        | chr20_60962943 |  |  |  |  |  |  |  |  | 0.61  | 98.77 | 0.61  |
| PCMTD2       | chr20_62906433 |  |  |  |  |  |  |  |  | 27.45 | 33.33 | 39.22 |
| PCMTD2       | chr20_62906514 |  |  |  |  |  |  |  |  | 31.37 | 29.41 | 39.22 |
| MRPL39       | chr21_26969703 |  |  |  |  |  |  |  |  | 30.26 | 53.95 | 15.79 |
| MRPL39       | chr21_26978950 |  |  |  |  |  |  |  |  | 25.71 | 58.57 | 15.71 |
| IFNAR1       | chr21_34715699 |  |  |  |  |  |  |  |  | 31.71 | 26.83 | 41.46 |
| SON          | chr21_34926260 |  |  |  |  |  |  |  |  | 34.55 | 23.64 | 41.82 |
| WRB          | chr21_40769290 |  |  |  |  |  |  |  |  | 11.63 | 62.79 | 25.58 |
| MAPK1        | chr22_22115004 |  |  |  |  |  |  |  |  | 43.14 | 27.45 | 29.41 |
| C22orf28     | chr22_32783904 |  |  |  |  |  |  |  |  | 19.13 | 53.04 | 27.83 |
| C22orf28     | chr22_32795641 |  |  |  |  |  |  |  |  | 28.57 | 34.29 | 37.14 |
| TIMP3        | chr22_33253280 |  |  |  |  |  |  |  |  | 18.58 | 55.75 | 25.66 |
| TIMP3        | chr22_33253292 |  |  |  |  |  |  |  |  | 18.64 | 56.78 | 24.58 |
| NHP2L1       | chr22_42070793 |  |  |  |  |  |  |  |  | 32.61 | 30.43 | 36.96 |
| ARFGAP3      | chr22_43218397 |  |  |  |  |  |  |  |  | 16.36 | 52.73 | 30.91 |
| TFG          | chr3_100467018 |  |  |  |  |  |  |  |  | 25.74 | 43.56 | 30.69 |
| TFG          | chr3_100467673 |  |  |  |  |  |  |  |  | 20.17 | 52.10 | 27.73 |
| TFG          | chr3_100467676 |  |  |  |  |  |  |  |  | 19.33 | 52.94 | 27.73 |
| CD200        | chr3_112059768 |  |  |  |  |  |  |  |  | 31.82 | 40.91 | 27.27 |
| CD200        | chr3_112063850 |  |  |  |  |  |  |  |  | 25.00 | 44.74 | 30.26 |
| CCDC80       | chr3_112359986 |  |  |  |  |  |  |  |  | 2.56  | 65.38 | 32.05 |
| B4GALT4      | chr3_118931389 |  |  |  |  |  |  |  |  | 40.74 | 18.52 | 40.74 |
| POGLUT1      | chr3_119213220 |  |  |  |  |  |  |  |  | 24.35 | 45.22 | 30.43 |
| TIMMDC1      | chr3_119242803 |  |  |  |  |  |  |  |  | 17.65 | 64.71 | 17.65 |
| FSTL1        | chr3_120114859 |  |  |  |  |  |  |  |  | 17.43 | 63.30 | 19.27 |
| KPNA1        | chr3_122140919 |  |  |  |  |  |  |  |  | 22.50 | 22.50 | 55.00 |
| UMPS         | chr3_124462808 |  |  |  |  |  |  |  |  | 30.51 | 37.29 | 32.20 |
| TMEM43       | chr3_14184719  |  |  |  |  |  |  |  |  | 43.10 | 27.59 | 29.31 |
| GYGI         | chr3_148745236 |  |  |  |  |  |  |  |  | 27.03 | 43.24 | 29.73 |
| HLTF         | chr3_148748380 |  |  |  |  |  |  |  |  | 39.13 | 19.57 | 41.30 |
| FGD5-AS1     | chr3_14984617  |  |  |  |  |  |  |  |  | 26.79 | 50.00 | 23.21 |
| SERP1        | chr3_150260853 |  |  |  |  |  |  |  |  | 41.67 | 29.17 | 29.17 |
| SELT         | chr3_150345690 |  |  |  |  |  |  |  |  | 5.56  | 72.22 | 22.22 |
| EAF1         | chr3_15483830  |  |  |  |  |  |  |  |  | 27.42 | 46.77 | 25.81 |
| SSR3         | chr3_156259966 |  |  |  |  |  |  |  |  | 9.49  | 82.91 | 7.59  |
| SSR3         | chr3_156266774 |  |  |  |  |  |  |  |  | 1.23  | 93.25 | 5.52  |
| LXN          | chr3_158384463 |  |  |  |  |  |  |  |  | 22.41 | 51.72 | 25.86 |
| TRIM59       | chr3_160152299 |  |  |  |  |  |  |  |  | 25.33 | 44.00 | 30.67 |
| TRIM59       | chr3_160156951 |  |  |  |  |  |  |  |  | 26.00 | 48.00 | 26.00 |
| DPH3         | chr3_16301564  |  |  |  |  |  |  |  |  | 28.57 | 16.67 | 54.76 |
| DPH3         | chr3_16305674  |  |  |  |  |  |  |  |  | 13.89 | 51.39 | 34.72 |
| AC008040.1   | chr3_169806897 |  |  |  |  |  |  |  |  | 39.66 | 17.24 | 43.10 |
| SKIL         | chr3_170112307 |  |  |  |  |  |  |  |  | 6.94  | 79.86 | 13.19 |
| SKIL         | chr3_170113481 |  |  |  |  |  |  |  |  | 10.32 | 72.90 | 16.77 |
| SKIL         | chr3_170113533 |  |  |  |  |  |  |  |  | 11.11 | 70.59 | 18.30 |
| SKIL         | chr3_170113601 |  |  |  |  |  |  |  |  | 12.75 | 67.11 | 20.13 |
| DCUN1D1      | chr3_182659953 |  |  |  |  |  |  |  |  | 34.21 | 35.53 | 30.26 |
| TFRC         | chr3_195776454 |  |  |  |  |  |  |  |  | 20.28 | 56.64 | 23.08 |
| RPL15        | chr3_23961353  |  |  |  |  |  |  |  |  | 12.14 | 67.14 | 20.71 |
| RPL15        | chr3_23961621  |  |  |  |  |  |  |  |  | 14.29 | 70.13 | 15.58 |
| CDCP1        | chr3_45125067  |  |  |  |  |  |  |  |  | 48.08 | 26.92 | 25.00 |
| FYCO1        | chr3_45959759  |  |  |  |  |  |  |  |  | 34.04 | 29.79 | 36.17 |
| MAP4         | chr3_47958037  |  |  |  |  |  |  |  |  | 42.86 | 35.71 | 21.43 |
| FAM208A      | chr3_56654703  |  |  |  |  |  |  |  |  | 57.69 | 15.38 | 26.92 |
| ARF4         | chr3_57557620  |  |  |  |  |  |  |  |  | 3.07  | 89.57 | 7.36  |
| PDHB         | chr3_58413662  |  |  |  |  |  |  |  |  | 22.68 | 51.55 | 25.77 |
| PDHB         | chr3_58413669  |  |  |  |  |  |  |  |  | 26.04 | 52.08 | 21.88 |
| THUMPD3      | chr3_9425911   |  |  |  |  |  |  |  |  | 31.91 | 19.15 | 48.94 |
| THUMPD3      | chr3_9425944   |  |  |  |  |  |  |  |  | 48.89 | 17.78 | 33.33 |
| THUMPD3      | chr3_9426224   |  |  |  |  |  |  |  |  | 47.06 | 21.57 | 31.37 |
| DCBLD2       | chr3_98516386  |  |  |  |  |  |  |  |  | 28.77 | 49.32 | 21.92 |
| ZNF518B      | chr4_10442700  |  |  |  |  |  |  |  |  | 26.67 | 36.00 | 37.33 |
| PPA2         | chr4_106317429 |  |  |  |  |  |  |  |  | 35.29 | 38.24 | 26.47 |
| CAMK2D       | chr4_114375133 |  |  |  |  |  |  |  |  | 33.66 | 51.49 | 14.85 |
| C4orf3       | chr4_120219534 |  |  |  |  |  |  |  |  | 33.33 | 40.00 | 26.67 |
| MAD2L1       | chr4_120981214 |  |  |  |  |  |  |  |  | 20.62 | 70.10 | 9.28  |
| NAA15        | chr4_140310520 |  |  |  |  |  |  |  |  | 26.06 | 66.20 | 7.75  |
| FAM198B      | chr4_159045843 |  |  |  |  |  |  |  |  | 22.22 | 62.22 | 15.56 |
| PPID         | chr4_159630817 |  |  |  |  |  |  |  |  | 30.95 | 23.81 | 45.24 |
| MSMO1        | chr4_166264119 |  |  |  |  |  |  |  |  | 9.23  | 81.54 | 9.23  |
| ANXA10       | chr4_169083694 |  |  |  |  |  |  |  |  | 37.50 | 22.50 | 40.00 |
| SLBP         | chr4_1694809   |  |  |  |  |  |  |  |  | 25.00 | 38.46 | 36.54 |
| PALLD        | chr4_169849389 |  |  |  |  |  |  |  |  | 19.55 | 58.65 | 21.80 |
| SPCS3        | chr4_177249681 |  |  |  |  |  |  |  |  | 9.42  | 60.87 | 29.71 |
| SPCS3        | chr4_177249913 |  |  |  |  |  |  |  |  | 39.72 | 55.32 | 4.96  |
| DCTD         | chr4_183811670 |  |  |  |  |  |  |  |  | 24.62 | 36.92 | 38.46 |
| DCTD         | chr4_183815688 |  |  |  |  |  |  |  |  | 36.21 | 34.48 | 29.31 |
| CASP3        | chr4_185548951 |  |  |  |  |  |  |  |  | 47.83 | 30.43 | 21.74 |
| KIAA1430     | chr4_186111639 |  |  |  |  |  |  |  |  | 33.33 | 40.74 | 25.93 |
| UGDH         | chr4_39500514  |  |  |  |  |  |  |  |  | 9.33  | 60.67 | 30.00 |
| UGDH         | chr4_39501086  |  |  |  |  |  |  |  |  | 5.73  | 65.61 | 28.66 |
| ATP10D       | chr4_47514685  |  |  |  |  |  |  |  |  | 43.48 | 28.26 | 28.26 |
| DCUN1D4      | chr4_52781759  |  |  |  |  |  |  |  |  | 17.28 | 38.27 | 44.44 |
| TMEM165      | chr4_56292101  |  |  |  |  |  |  |  |  | 14.29 | 47.62 | 38.10 |
| UBA6         | chr4_68482401  |  |  |  |  |  |  |  |  | 32.35 | 38.24 | 29.41 |

UBA6 chr4\_68482405  
 UBA6 chr4\_68483472  
 UBA6 chr4\_68483534  
 CXCL6 chr4\_74703999  
 SEPT11 chr4\_77958130  
 SEPT11 chr4\_77958765  
 CCNI chr4\_77968968  
 PDLIM5 chr4\_95588565  
 PDLIM5 chr4\_95588823  
 RAP1GDS1 chr4\_99363400  
 PJA2 chr5\_108714298  
 WDR36 chr5\_110464687  
 ALDH7A1 chr5\_125880589  
 HSPA9 chr5\_137902339  
 MATR3 chr5\_138665756  
 MATR3 chr5\_138665792  
 NR3C1 chr5\_142661595  
 YIPF5 chr5\_143538589  
 YIPF5 chr5\_145539142  
 LARS chr5\_145543972  
 CTB-89H12.4 chr5\_148873854  
 SPARC chr5\_151043111  
 CLINT1 chr5\_157213497  
 MYO10 chr5\_16666180  
 NPM1 chr5\_170819887  
 KIAA1191 chr5\_175773287  
 HNRNPAB chr5\_177637882  
 NUP155 chr5\_37288535  
 PELO chr5\_52097764  
 NDUFS4 chr5\_52942197  
 NDUFS4 chr5\_52979097  
 SREK1IP1 chr5\_64023981  
 MAP1B chr5\_71492734  
 NSA2 chr5\_74069863  
 WDR41 chr5\_76734084  
 AP3B1 chr5\_77298619  
 VCAN chr5\_82876271  
 VCAN chr5\_82877682  
 EDIL3 chr5\_83237255  
 EDIL3 chr5\_83238236  
 RHOBTB3 chr5\_95084131  
 GLRX chr5\_95149966  
 ERAP1 chr5\_96110211  
 R1OK2 chr5\_96513471  
 RGM5 chr5\_98131505  
 DSE chr6\_116758932  
 GJA1 chr6\_121770464  
 SERINC1 chr6\_122765026  
 SERINC1 chr6\_122765948  
 ECHDC1 chr6\_127610021  
 SNORD100 chr6\_133138010  
 BCLAF1 chr6\_136590640  
 BCLAF1 chr6\_136599404  
 PERP chr6\_138412612  
 VTA1 chr6\_142541553  
 VTA1 chr6\_142541769  
 FUCA2 chr6\_143825104  
 PHACTR2 chr6\_144151026  
 PHACTR2 chr6\_144151767  
 MRPL18 chr6\_160219337  
 THBS2 chr6\_169616347  
 HMGN4 chr6\_26546048  
 SERPINB9 chr6\_2887652  
 SERPINB9 chr6\_2887771  
 SRSF3 chr6\_36570366  
 GLO1 chr6\_38643796  
 EC12 chr6\_4116262  
 MRPS10 chr6\_42185564  
 UBR2 chr6\_42659979  
 MAD2L1BP chr6\_43608386  
 SLC35B2 chr6\_44222047  
 SLC35B2 chr6\_44222109  
 ELOVL5 chr6\_53133964  
 DST chr6\_56557411  
 DST chr6\_56557822  
 SSR1 chr6\_7285193  
 SSR1 chr6\_7288297  
 SSR1 chr6\_7288341  
 SSR1 chr6\_7288544  
 SSR1 chr6\_7288613  
 SSR1 chr6\_7289166  
 TTK chr6\_80751942  
 PGM3 chr6\_83880167  
 ORC3 chr6\_88377049  
 UBE2J1 chr6\_90037968  
 NDUFAF4 chr6\_97339078  
 NDUFAF4 chr6\_97339088  
 LAMB1 chr7\_107569962  
 AC073346.2 chr7\_112756994  
 TES chr7\_115897871  
 TES chr7\_115897884  
 TES chr7\_115898177  
 CAV1 chr7\_116200587  
 CAPZA2 chr7\_116558716  
 CALU chr7\_128409580  
 CALD1 chr7\_134618710  
 CREB3L2 chr7\_137560697  
 MRPS33 chr7\_140706157  
 TRBC2 chr7\_142499071  
 PDIA4 chr7\_148702362

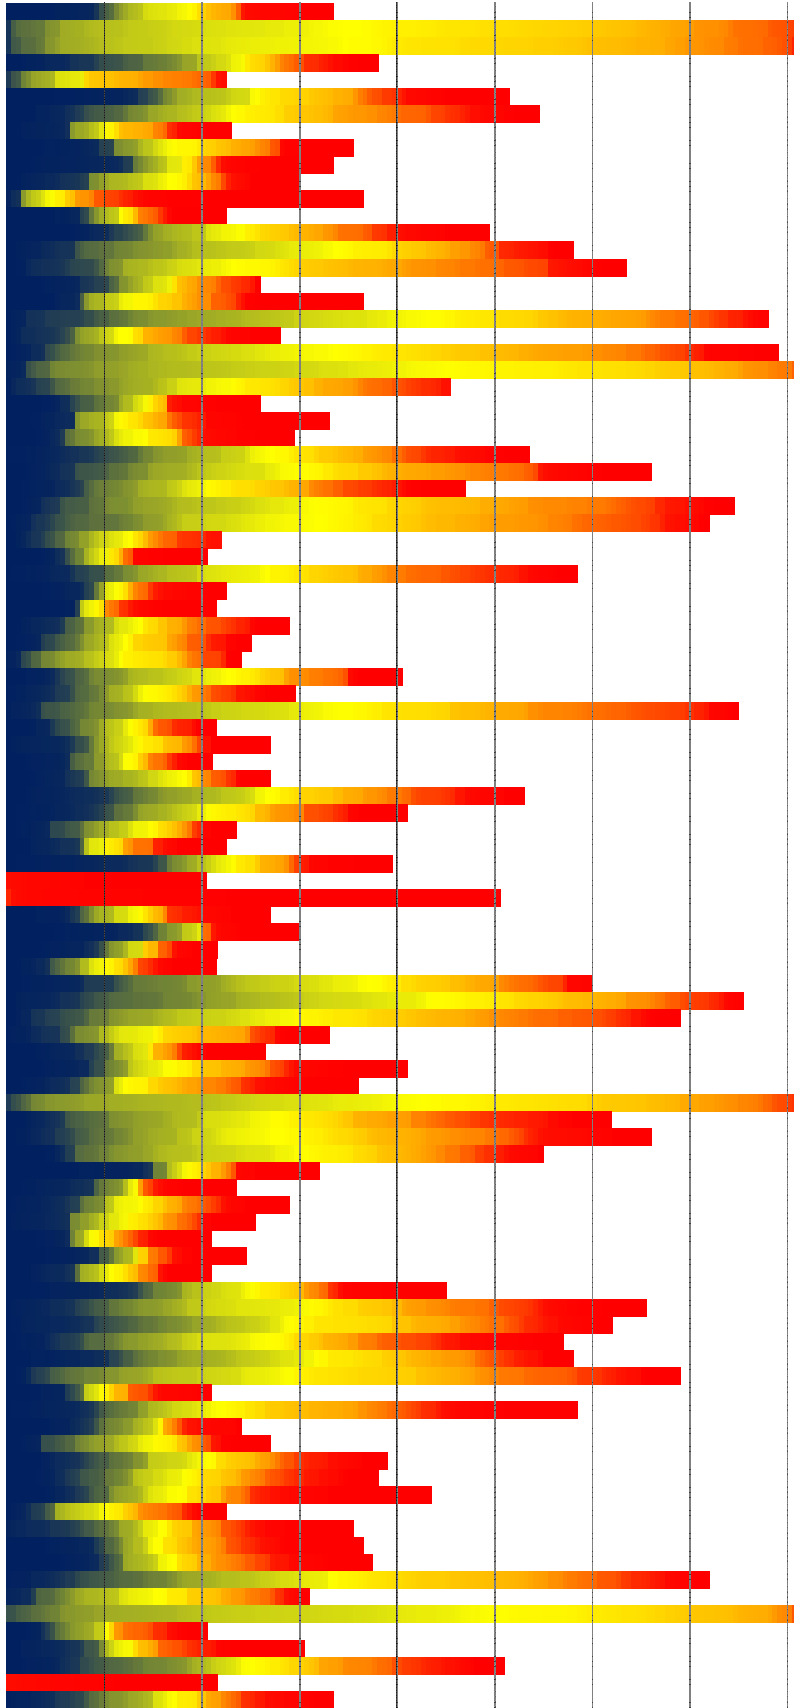

|       |       |        |
|-------|-------|--------|
| 32.84 | 37.31 | 29.85  |
| 4.29  | 91.41 | 4.29   |
| 4.29  | 90.80 | 4.91   |
| 39.47 | 38.16 | 22.37  |
| 6.67  | 84.44 | 8.89   |
| 31.07 | 40.78 | 28.16  |
| 22.94 | 53.21 | 23.85  |
| 28.26 | 43.48 | 28.26  |
| 30.99 | 45.07 | 23.94  |
| 38.81 | 23.88 | 37.31  |
| 28.33 | 45.00 | 26.67  |
| 4.11  | 20.55 | 75.34  |
| 40.00 | 26.67 | 33.33  |
| 29.29 | 44.44 | 26.26  |
| 18.97 | 65.52 | 15.52  |
| 15.75 | 63.78 | 20.47  |
| 44.23 | 38.46 | 17.31  |
| 21.92 | 35.62 | 42.47  |
| 16.03 | 74.36 | 9.62   |
| 25.00 | 39.29 | 35.71  |
| 8.86  | 74.05 | 17.09  |
| 5.56  | 93.83 | 0.62   |
| 14.29 | 70.33 | 15.38  |
| 38.46 | 25.00 | 36.54  |
| 21.21 | 30.30 | 48.48  |
| 23.73 | 37.29 | 38.98  |
| 26.17 | 49.53 | 24.30  |
| 18.94 | 61.36 | 19.70  |
| 19.15 | 52.13 | 28.72  |
| 13.42 | 70.47 | 16.11  |
| 15.97 | 66.67 | 17.36  |
| 27.27 | 45.45 | 27.27  |
| 34.15 | 26.83 | 39.02  |
| 19.66 | 52.99 | 27.35  |
| 42.22 | 22.22 | 35.56  |
| 34.88 | 18.60 | 46.51  |
| 27.59 | 43.10 | 29.31  |
| 28.00 | 46.00 | 26.00  |
| 14.58 | 68.75 | 16.67  |
| 20.99 | 64.20 | 14.81  |
| 30.51 | 40.68 | 28.81  |
| 11.33 | 71.33 | 17.33  |
| 34.88 | 37.21 | 27.91  |
| 33.33 | 38.89 | 27.78  |
| 38.10 | 38.10 | 23.81  |
| 31.48 | 46.30 | 22.22  |
| 26.42 | 51.89 | 21.70  |
| 30.49 | 43.90 | 25.61  |
| 34.04 | 46.81 | 19.15  |
| 35.56 | 31.11 | 33.33  |
| 41.77 | 32.91 | 25.32  |
| 0.00  | 0.00  | 100.00 |
| 0.00  | 0.00  | 100.00 |
| 31.48 | 29.63 | 38.89  |
| 51.67 | 18.33 | 30.00  |
| 46.51 | 25.58 | 27.91  |
| 27.91 | 34.88 | 37.21  |
| 21.67 | 68.33 | 10.00  |
| 20.53 | 68.87 | 10.60  |
| 12.32 | 69.57 | 18.12  |
| 21.21 | 54.55 | 24.24  |
| 39.62 | 26.42 | 33.96  |
| 24.39 | 41.46 | 34.15  |
| 23.61 | 40.28 | 36.11  |
| 3.07  | 92.64 | 4.29   |
| 16.94 | 54.84 | 28.23  |
| 15.91 | 62.12 | 21.97  |
| 17.27 | 67.27 | 15.45  |
| 46.88 | 25.00 | 28.13  |
| 42.55 | 17.02 | 40.43  |
| 27.59 | 41.38 | 31.03  |
| 25.49 | 47.06 | 27.45  |
| 30.95 | 28.57 | 40.48  |
| 44.90 | 18.37 | 36.73  |
| 35.71 | 35.71 | 28.57  |
| 33.33 | 40.00 | 26.67  |
| 17.56 | 58.02 | 24.43  |
| 24.19 | 58.06 | 17.74  |
| 19.30 | 48.25 | 32.46  |
| 24.14 | 59.48 | 16.38  |
| 10.87 | 68.12 | 21.01  |
| 38.10 | 21.43 | 40.48  |
| 19.66 | 48.72 | 31.62  |
| 41.67 | 31.25 | 27.08  |
| 25.93 | 48.15 | 25.93  |
| 30.77 | 42.31 | 26.92  |
| 26.32 | 43.42 | 30.26  |
| 24.14 | 32.18 | 43.68  |
| 22.22 | 51.11 | 26.67  |
| 29.58 | 32.39 | 38.03  |
| 31.51 | 30.14 | 38.36  |
| 32.00 | 33.33 | 34.67  |
| 19.44 | 64.58 | 15.97  |
| 16.13 | 70.97 | 12.90  |
| 4.91  | 93.87 | 1.23   |
| 26.83 | 36.59 | 36.59  |
| 31.15 | 19.67 | 49.18  |
| 26.47 | 50.98 | 22.55  |
| 0.00  | 0.00  | 100.00 |
| 28.36 | 41.79 | 29.85  |



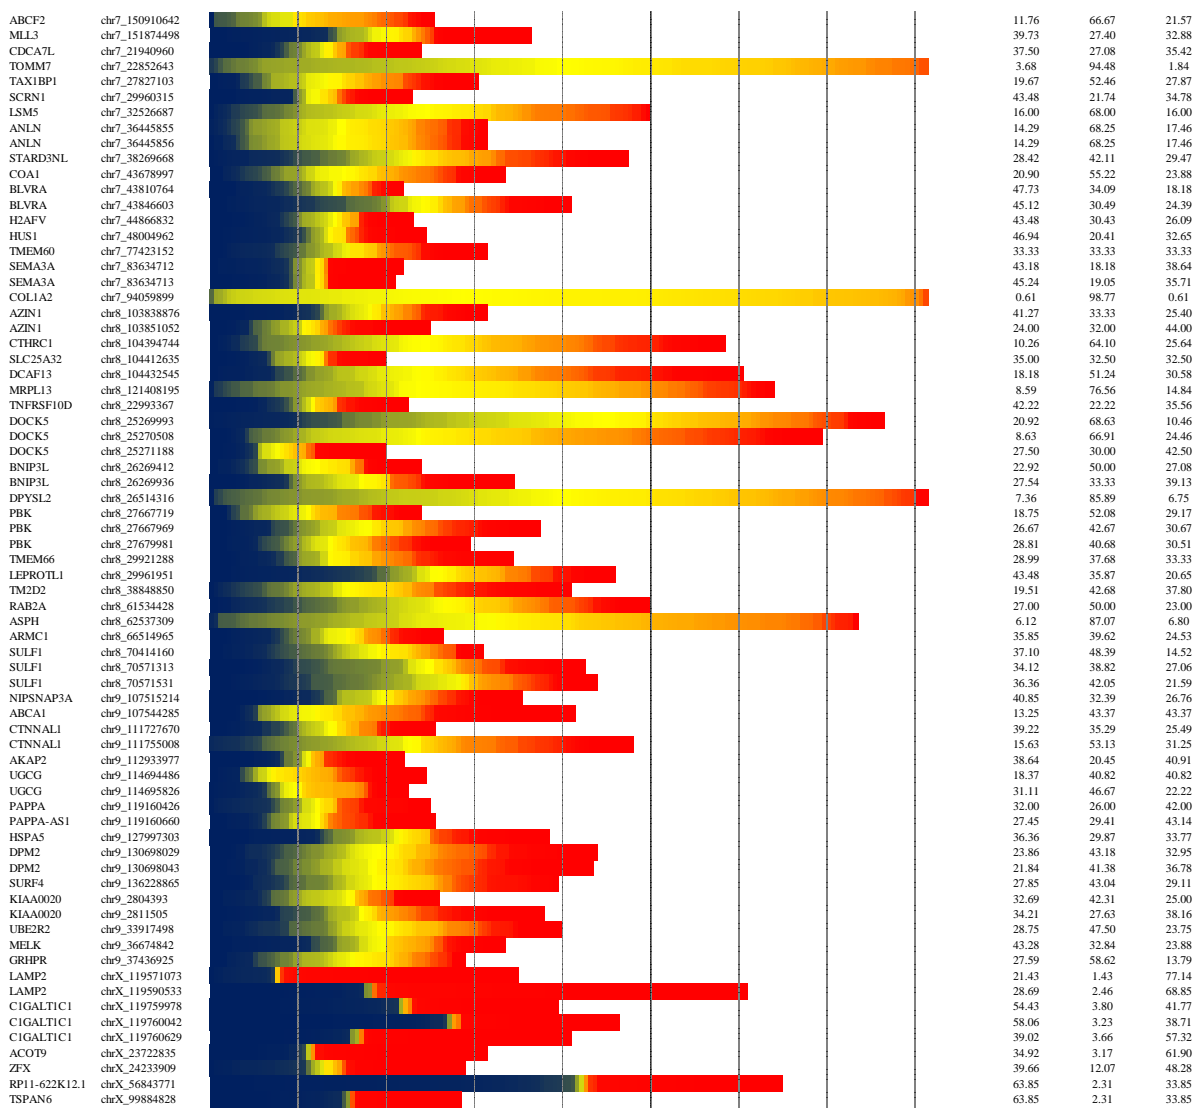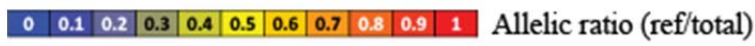

**Figure S11. Single-cell allelic ratio distribution per detected genes (UCF1014).**

We selected 568 genes for a representative view of the allelic expression in single cells. Index bar indicates the color-coded for the allelic ratio values (reference reads/ total reads). The columns are the gene name, the genomic coordinate of the hetSNV, the color coded column are the single cells, the three last columns are the percentage of cells with an allelic ratio between [0, 0.2], [0.2, 0.8] and [0.8, 1]. We subselected 60 genes out of 568 genes to make the figure 5.
